# Supplementary material for: Rational Design of Short Locked Nucleic Acid-Modified 2′-O-Methyl Antisense Oligonucleotides for Efficient Exon-Skipping In Vitro
Source: PubMed Central journal article supplement — Mol Ther Nucleic Acids. 2017 Sep 12;9:155–61. doi: 10.1016/j.omtn.2017.09.002 (PMC5633351; doi:10.1016/j.omtn.2017.09.002), 2017-09-12
Supplement: mmc1.pdf [file mmc1.pdf]

**OMTN, Volume 9**

**Supplemental Information**

**Rational Design of Short Locked Nucleic Acid-  
Modified 2'-O-Methyl Antisense Oligonucleotides  
for Efficient Exon-Skipping In Vitro**

**Bao T. Le, Abbie M. Adams, Susan Fletcher, Stephen D. Wilton, and Rakesh N. Veedu**

Supplemental data

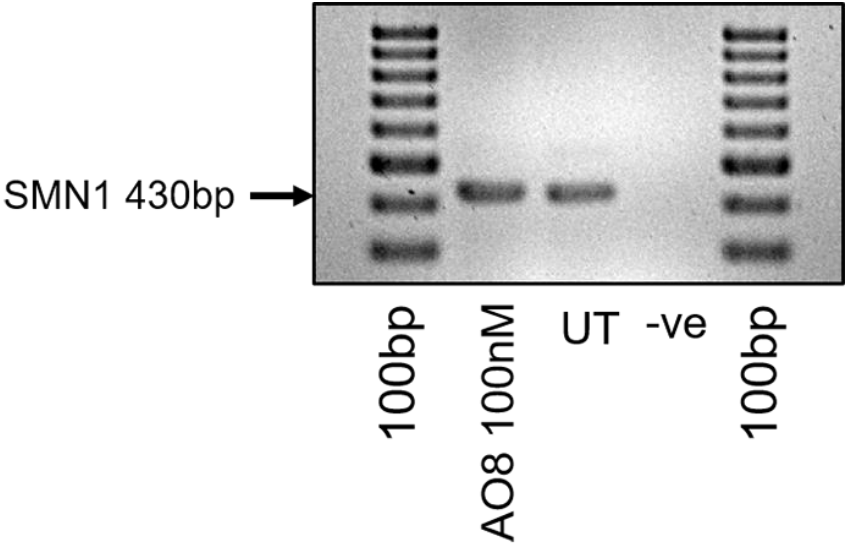

**Figure S1.** RT-PCR result of *SMN1* transcript showed no off-target effect when treated with AO8. UT: untreated; -ve: negative control.
